# Supplementary material
Source: PubMed Central journal article supplement (PMC7132617)
Supplement: mmc1.pdf [file mmc1.pdf]

YMTHE, Volume 28

## **Supplemental Information**

### **Downregulation of the Arg/N-degron Pathway**

### **Sensitizes Cancer Cells to Chemotherapy *In Vivo***

**Dominique Leboeuf, Tatiana Abakumova, Tatiana Prikazchikova, Luke Rhym, Daniel G. Anderson, Timofei S. Zatsepin, and Konstantin I. Piatkov**

**a**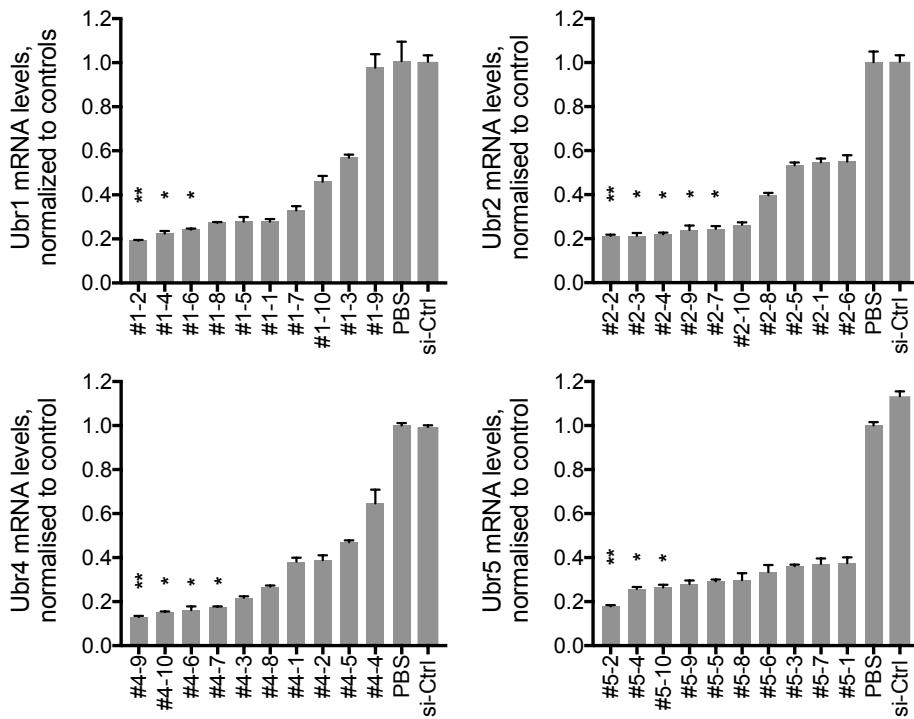**b**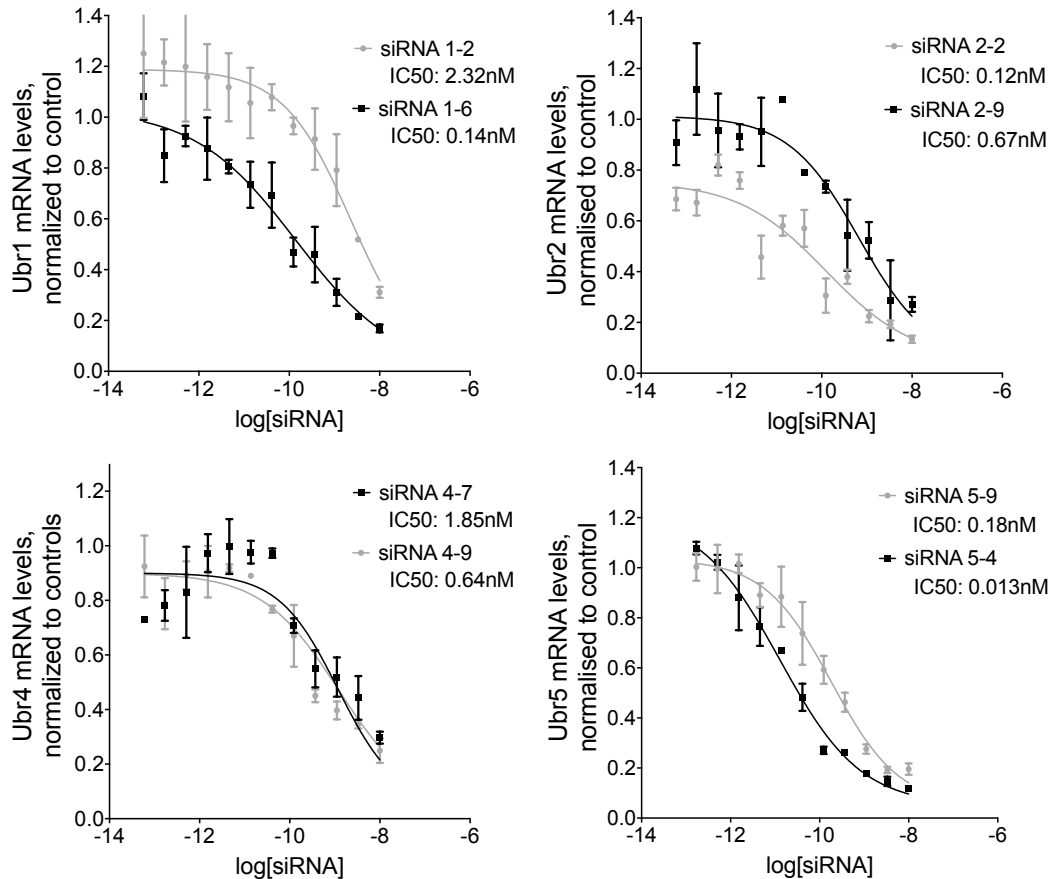

**Figure S1a-b. Selection of siRNA, in vitro and in vivo.** (a) mRNA downregulation in Hepa 1-6 cells by 1nM of specific siRNA against Ubr1, Ubr2, Ubr4 or Ubr5. mRNA levels were analyzed 24h post transfection. (b) Dose-dependence of mRNA downregulation in Hepa 1-6 cells. mRNA levels were analyzed 24h post transfection (mean  $\pm$  SD). P values were obtained using a one-way ANOVA, comparing to controls. (\*P < 0.05, \*\*P < 0.005, \*\*\*P < 0.0005, \*\*\*\*P 0.0001)

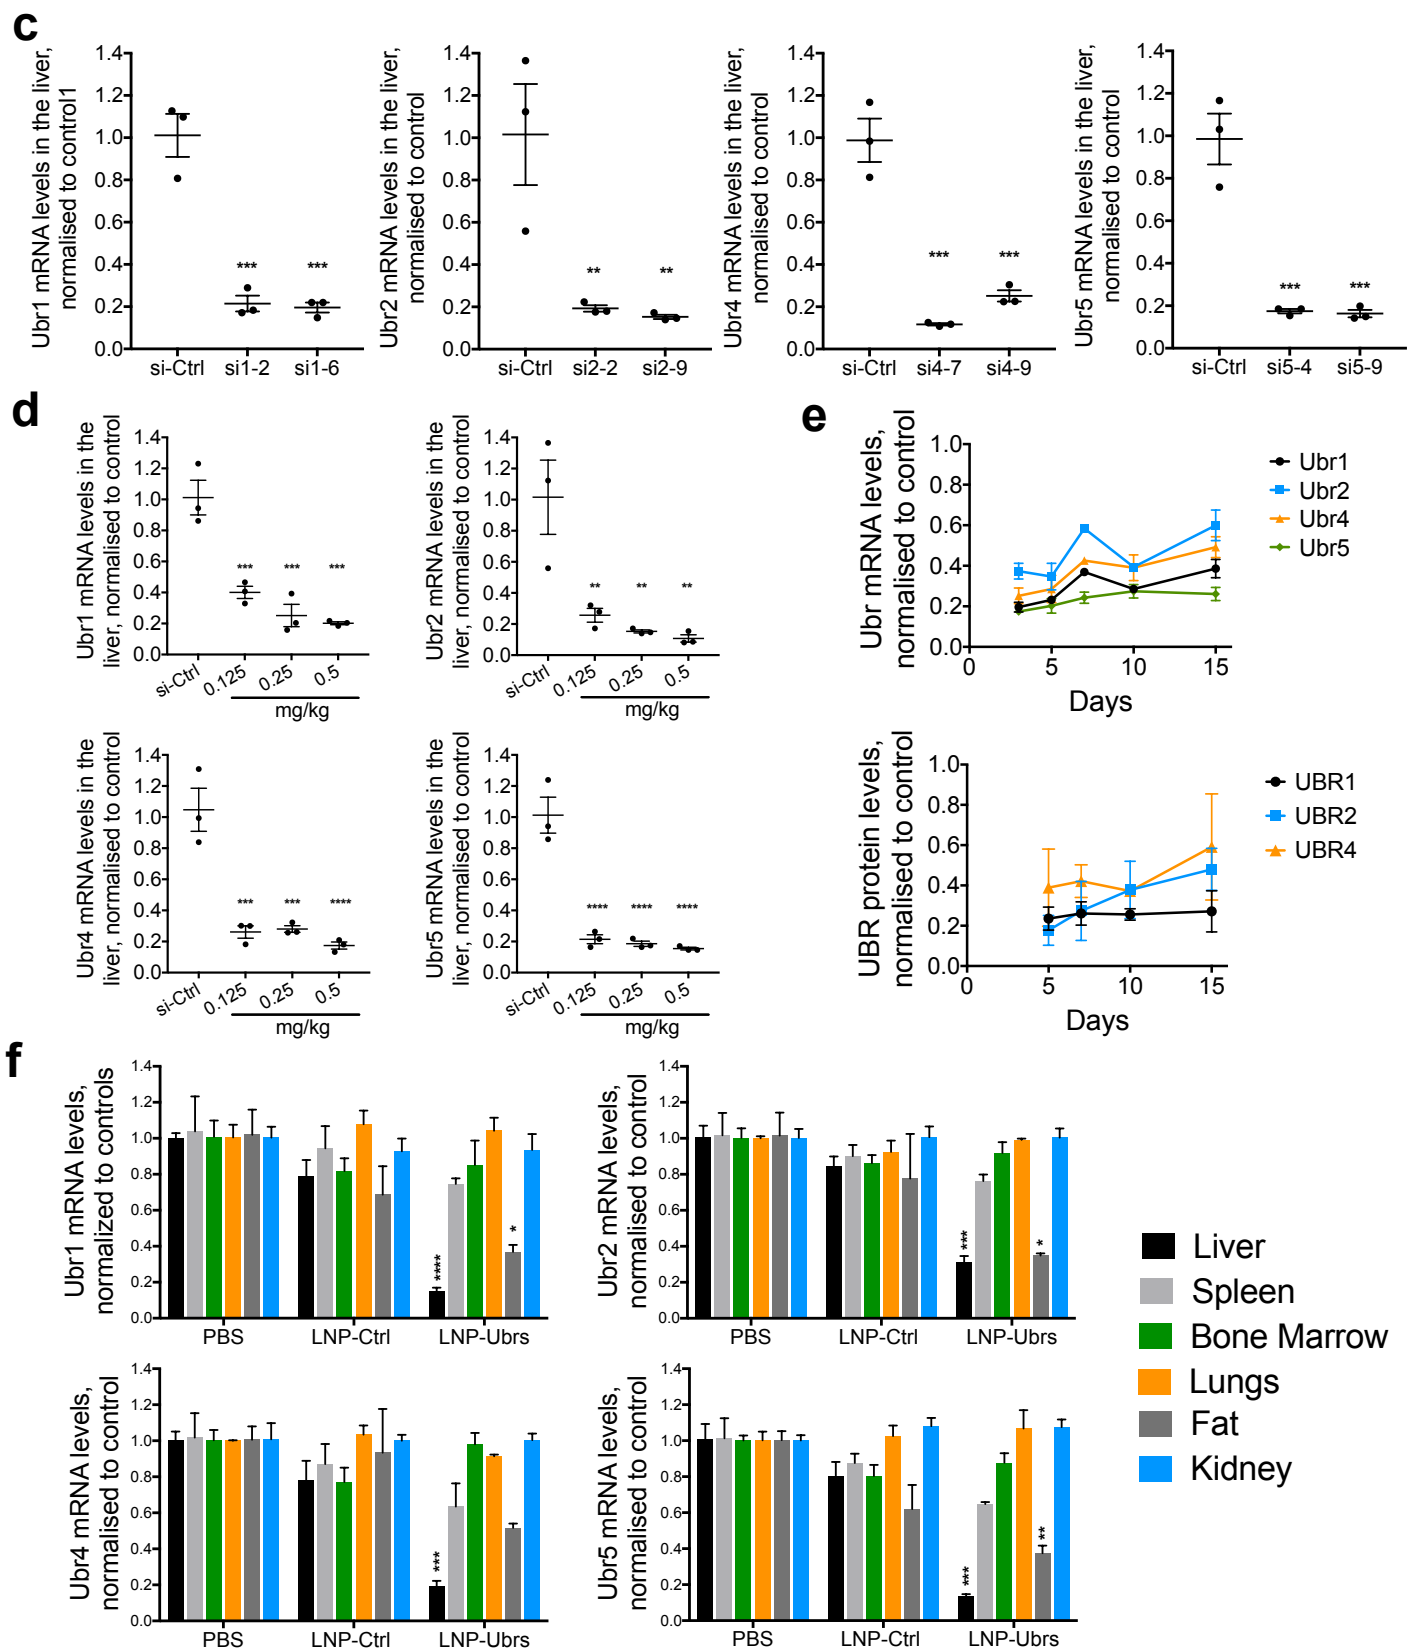

**Figure S1c-f. Selection of siRNA, in vitro and in vivo.** (c) Ubr mRNA levels in the total liver 3 days post injection of one of two specific LNP-siRNA (d) Dose-dependence downregulation of mRNA levels in total liver analyzed 3 days post injection (e) recovery of Ubr mRNA and protein levels in the liver at 3, 5, 7, 10 or 15 days after single-dose injections of LNP-siRNA (f) Tissue specific activity of systemically delivered siRNA formulated into LNPs analyzed 3 days post injection. For all in vivo experiments, n=3 and results presented as mean  $\pm$  SEM. P values were obtained using a one-way ANOVA, comparing to controls. (\*P < 0.05, \*\*P < 0.005, \*\*\*P < 0.0005, \*\*\*\*P 0.0001)

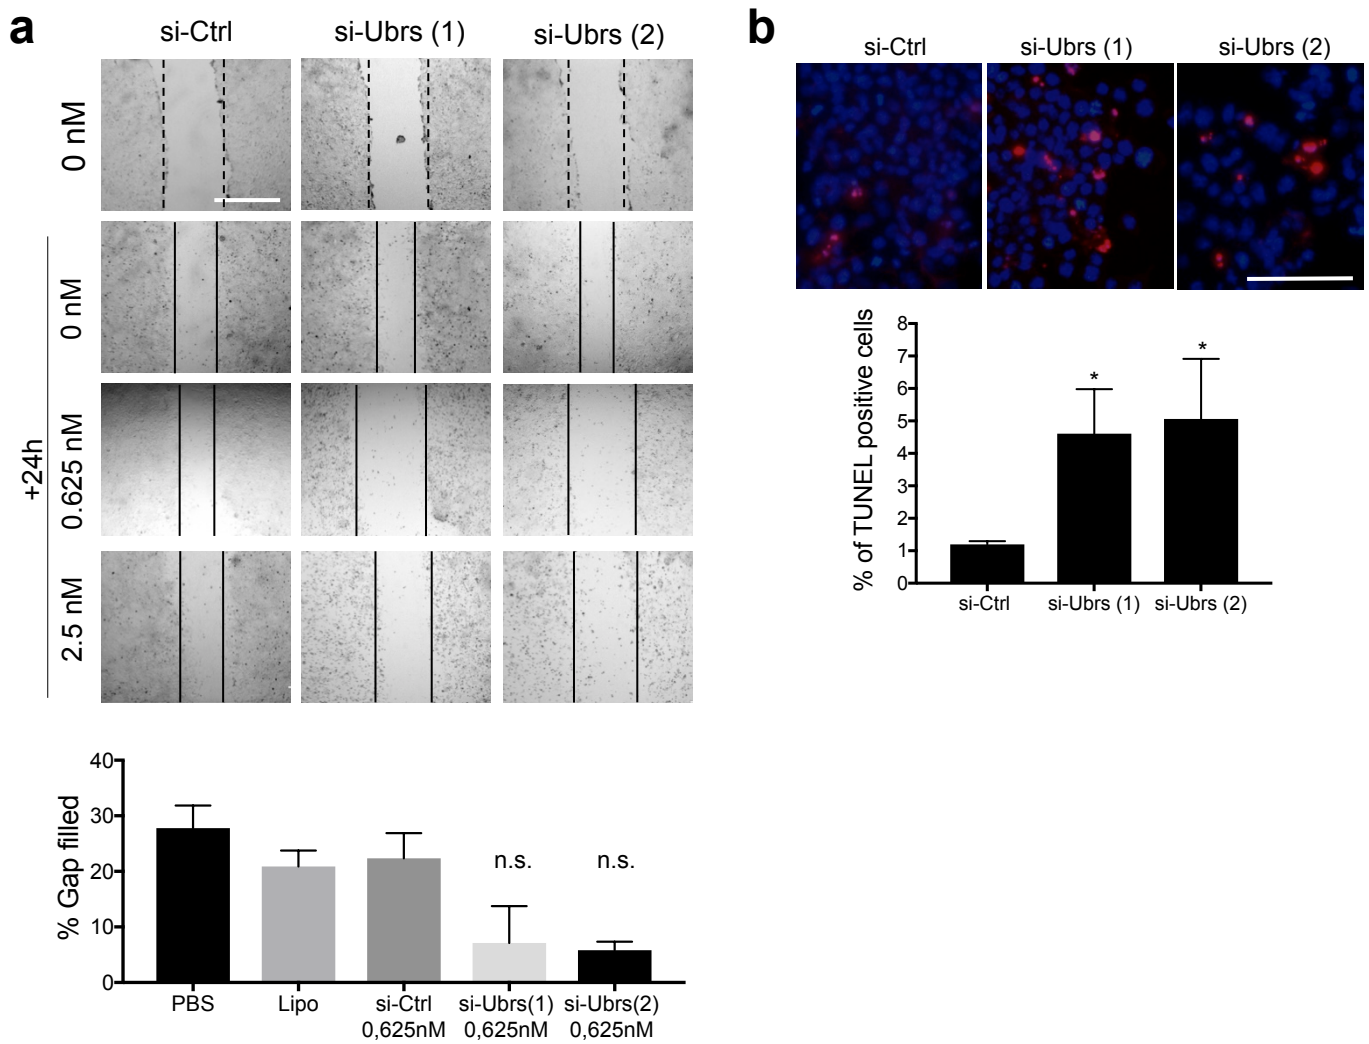

**Figure S2. In vitro phenotype observed after Ubr downregulation is not an off target effect of siRNA.** (a) Migration assay performed on Hepa 1-6 cells after 72h of exposure to two different sets of siRNA against Ubrs. (b) Analysis of cell death by terminal deoxynucleotidyl transferase dUTP nick end labeling (TUNEL) in Hepa 1-6 cells, after 72h of exposure to two different sets of siRNA against Ubrs, at 10nM. Red nuclei represent TUNEL-positive cells. Scale bar, 100  $\mu$ m. Results show mean  $\pm$  SD. P values were determined by Mann Whitney tests (\*P < 0.05)

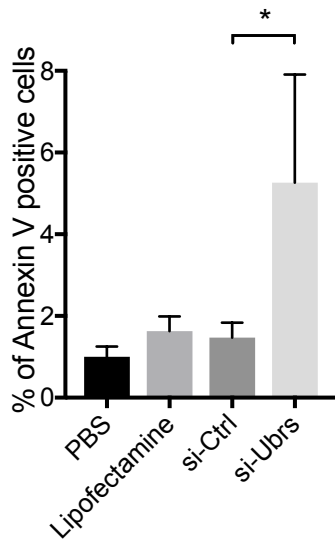

**Figure S3. Ubr downregulation causes an increase in apoptosis.** Analysis of cell death by Annexin V / 7AAD staining, evaluated by flow cytometry, in Hepa 1-6 cells, after 72h of exposure to siRNA against Ubrs, at 1nM. Results show mean  $\pm$  SD. P values were determined by Mann Whitney tests (\*P < 0.05)

**a**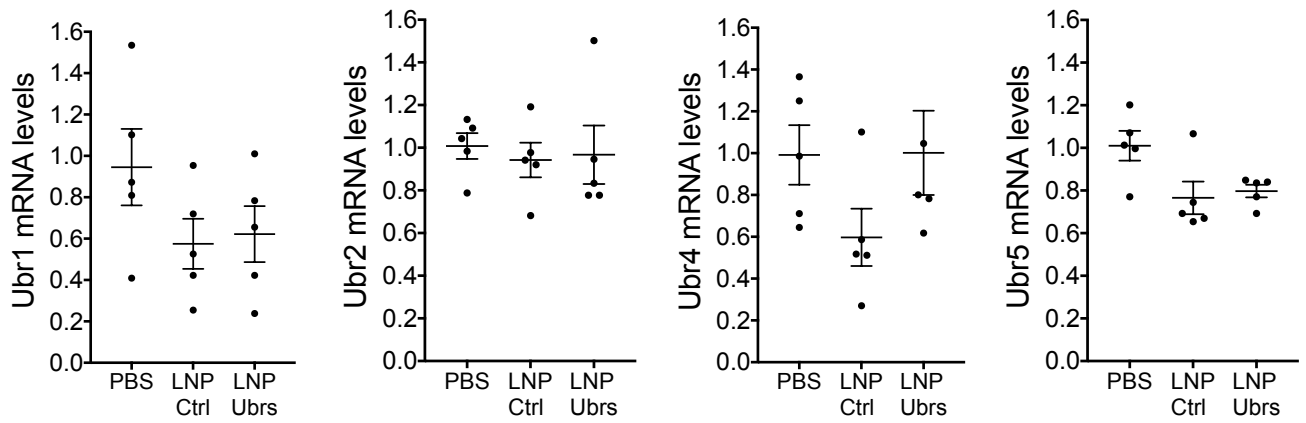**b**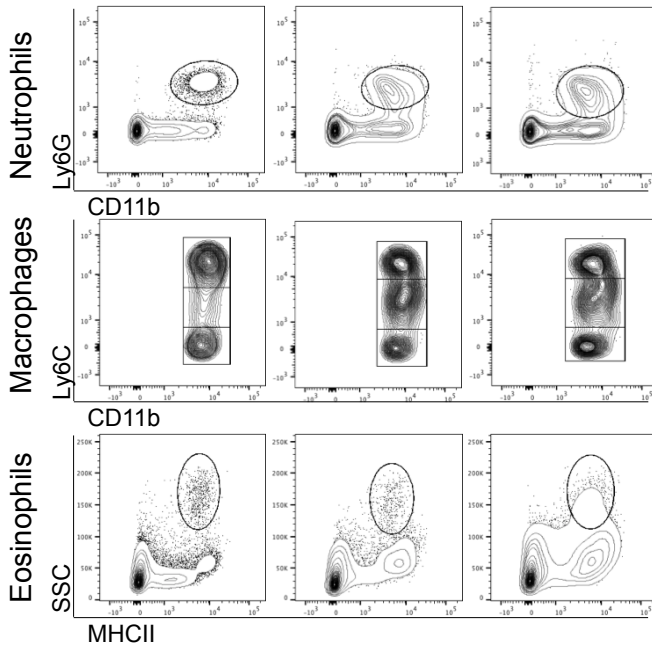**c**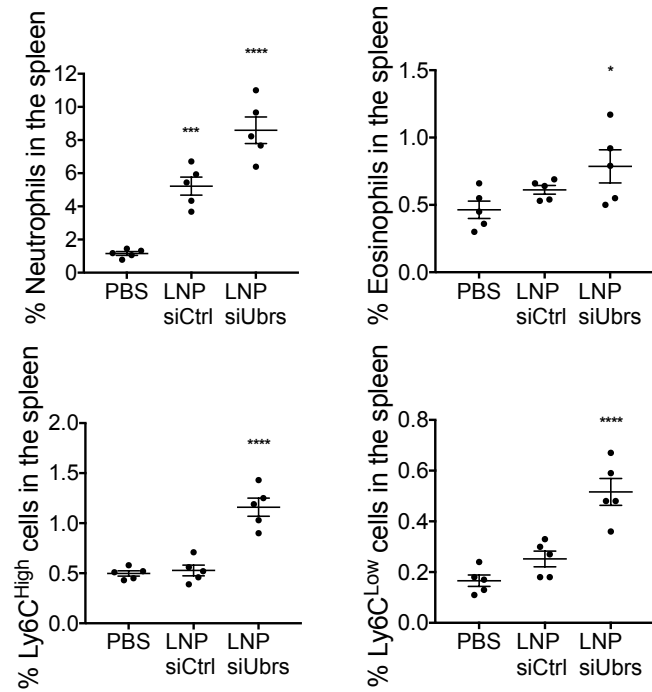

**Figure S4. Effect of chronic downregulation of Ubr-Ubiquitin ligases in the spleen.** (a) mRNA levels of Ubr1, Ubr2, Ubr4 and Ubr5 in the spleen of LNP-treated mice. (b) Representative flow cytometry analysis of neutrophil, macrophage and eosinophil populations in the spleen of mice treated with LNPs. (c) % of neutrophil, Ly6C<sup>high</sup> macrophage or eosinophil populations in the spleen of LNP or vehicle treated mice, gated on CD45<sup>+</sup> cells. Results show mean  $\pm$  SEM. n=5 mice per group. P values were obtained using a one-way ANOVA, comparing to controls. (\*P < 0.05, \*\*\*P < 0.0005, \*\*\*\*P < 0.0001)

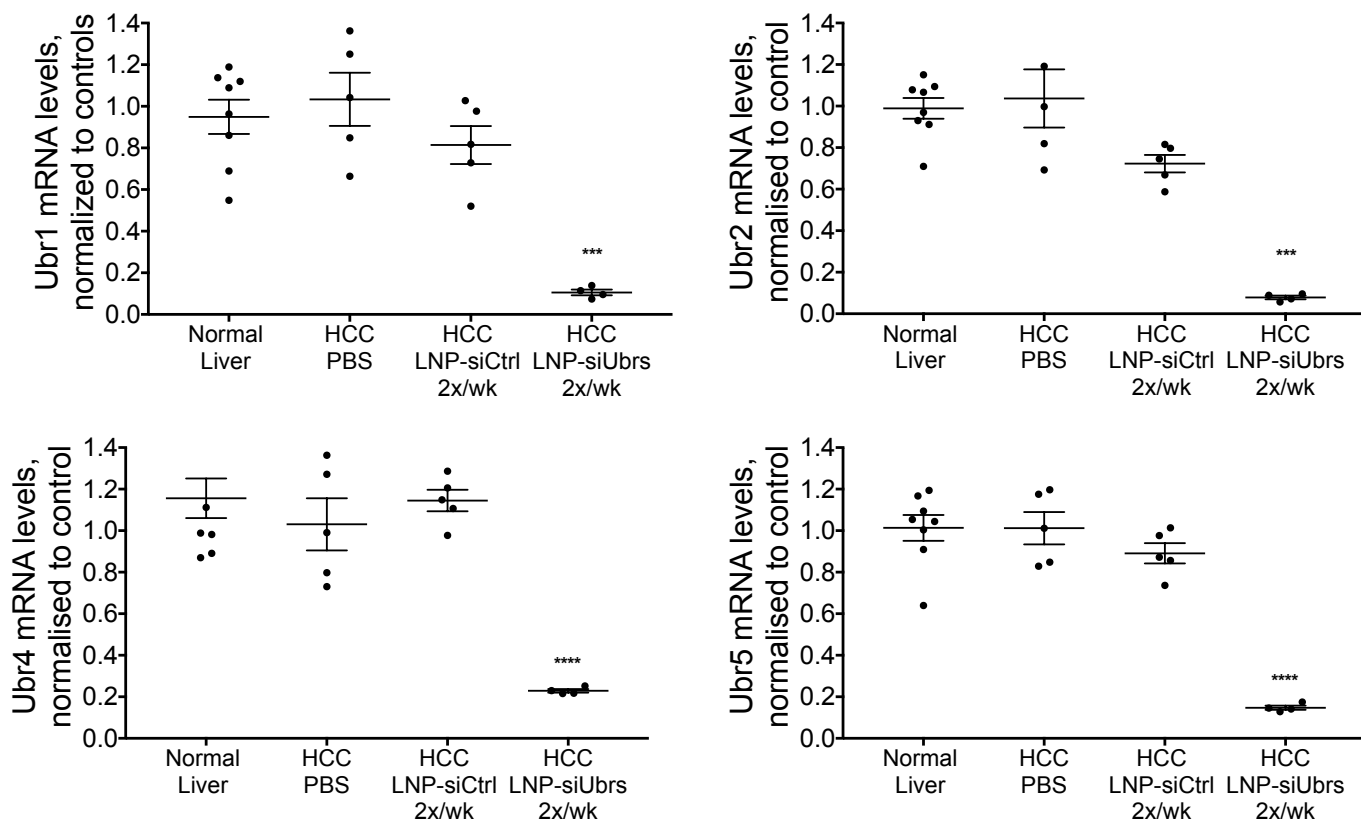

**Figure S5. Expression and downregulation of Ubr-Ubiquitin ligases in the liver of HCC mice.** mRNA levels of Ubr1, Ubr2, Ubr4 and Ubr5 in the liver of healthy and HCC mice was measured after 5 weeks of bi-weekly i.v. injections of a total of 1.4mg/kg of LNPs. (\*\*\*) $P < 0.0005$ , (\*\*\*\*) $P < 0.0001$ )

a

Figure S6a consists of two line graphs. The left graph plots '% cell proliferation, normalized to control' (y-axis, 0-100) against '[siRNA, nM]' (x-axis, log scale from 0.01 to 100). It shows four data series: si-Ctrl (black circles), si-Ctrl + Stau 50nM (grey squares), si-Ubrs (black triangles), and si-Ubrs + Stau 50nM (grey diamonds). All series start at 100% proliferation at 0.01 nM. The si-Ubrs series shows a sharp decline starting at 0.1 nM, reaching ~20% at 10 nM. The si-Ubrs + Stau 50nM series shows a similar decline but is slightly lower than the si-Ubrs series. The si-Ctrl and si-Ctrl + Stau 50nM series remain near 100% proliferation across the concentration range.

The right graph plots '% cell proliferation, normalized to control' (y-axis, 0-100) against '[Staurosporin, nM]' (x-axis, 0 to 120). It shows two data series: si-Ctrl (black circles) and si-Ubrs (black triangles). Both series remain at 100% proliferation across the concentration range from 0 to 120 nM.

b

Figure S6b is a bar chart showing the '% of TUNEL positive cells' (y-axis, 0.0 to 1.5) for six treatment groups (x-axis): Ctrl, Ctrl + Stau, si-Ctrl, si-Ctrl + Stau, si-Ubrs, and si-Ubrs + Stau. The bars represent mean values with error bars for standard deviation. The Ctrl bar is at ~0.4. The Ctrl + Stau bar is at ~0.5. The si-Ctrl bar is at ~0.4. The si-Ctrl + Stau bar is at ~0.6. The si-Ubrs bar is at ~0.45. The si-Ubrs + Stau bar is at ~1.25. Statistical significance is indicated by brackets: \*\* between si-Ctrl + Stau and si-Ubrs; \*\*\*\* between si-Ctrl + Stau and si-Ubrs + Stau; \*\*\*\* between si-Ubrs and si-Ubrs + Stau.

| Treatment      | % of TUNEL positive cells (approx.) |
|----------------|-------------------------------------|
| Ctrl           | 0.4                                 |
| Ctrl + Stau    | 0.5                                 |
| si-Ctrl        | 0.4                                 |
| si-Ctrl + Stau | 0.6                                 |
| si-Ubrs        | 0.45                                |
| si-Ubrs + Stau | 1.25                                |

**Figure S6. Knockdown of Ubr-Ubiquitin ligases of the N-end rule potentiates the action of apoptosis inducing drugs in vitro.** (a) Proliferation of Hepa 1-6 cells after exposure to siRNA and Staurosporine (left) or Staurosporine alone (right). (b) Analysis of cell death by TUNEL, in Hepa 1-6 cells after 72h of exposure to 1nM siRNA against Ubrs and an additional 24h to Staurosporine at 50nM. Results show mean  $\pm$  SD. P values were determined by a one way Anova (\*\*P 0.001, \*\*\*\*P <0.0001)

Figure S6



**a**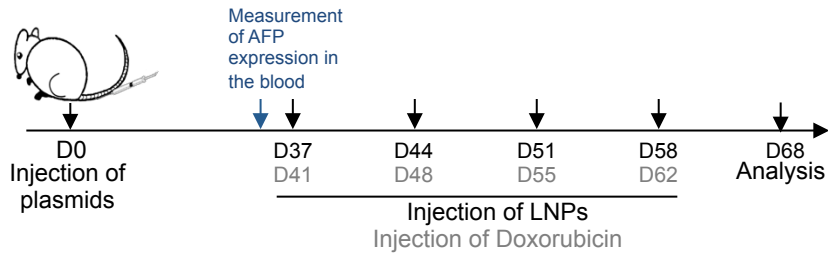**b**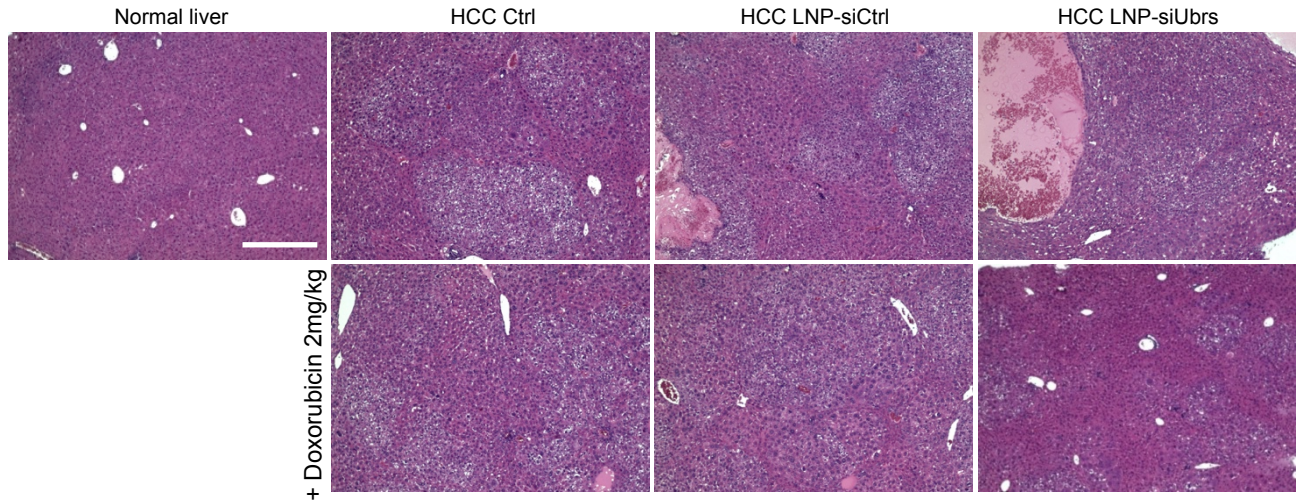**c**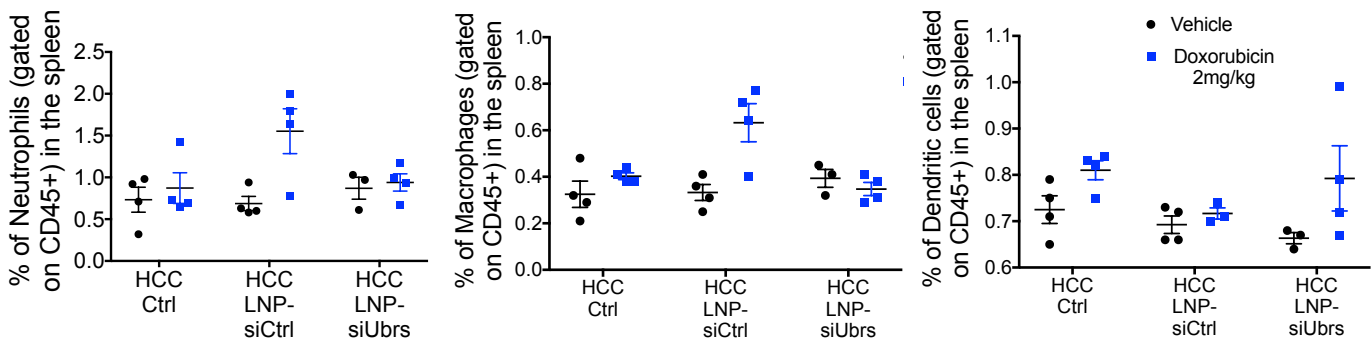

**Figure S7. Chemotherapy in HCC is more efficient together with downregulation of the N-end rule pathway.** (a) Schematic representation of the experiment: timeline of tumor induction (injection of oncogene-encoding plasmids) and repeated injections of LNP-formulated siRNA (black) and Doxorubicin (green). Tissues were collected for analysis on day 68 after tumor induction. (b) H&E staining of liver sections from HCC mice treated with LNPs and Doxorubicin. Scale bar = 100um. (c) Analysis by flow cytometry of Neutrophils, Macrophages and Dendritic cells in the spleen of HCC mice treated with LNPs and Doxorubicin.

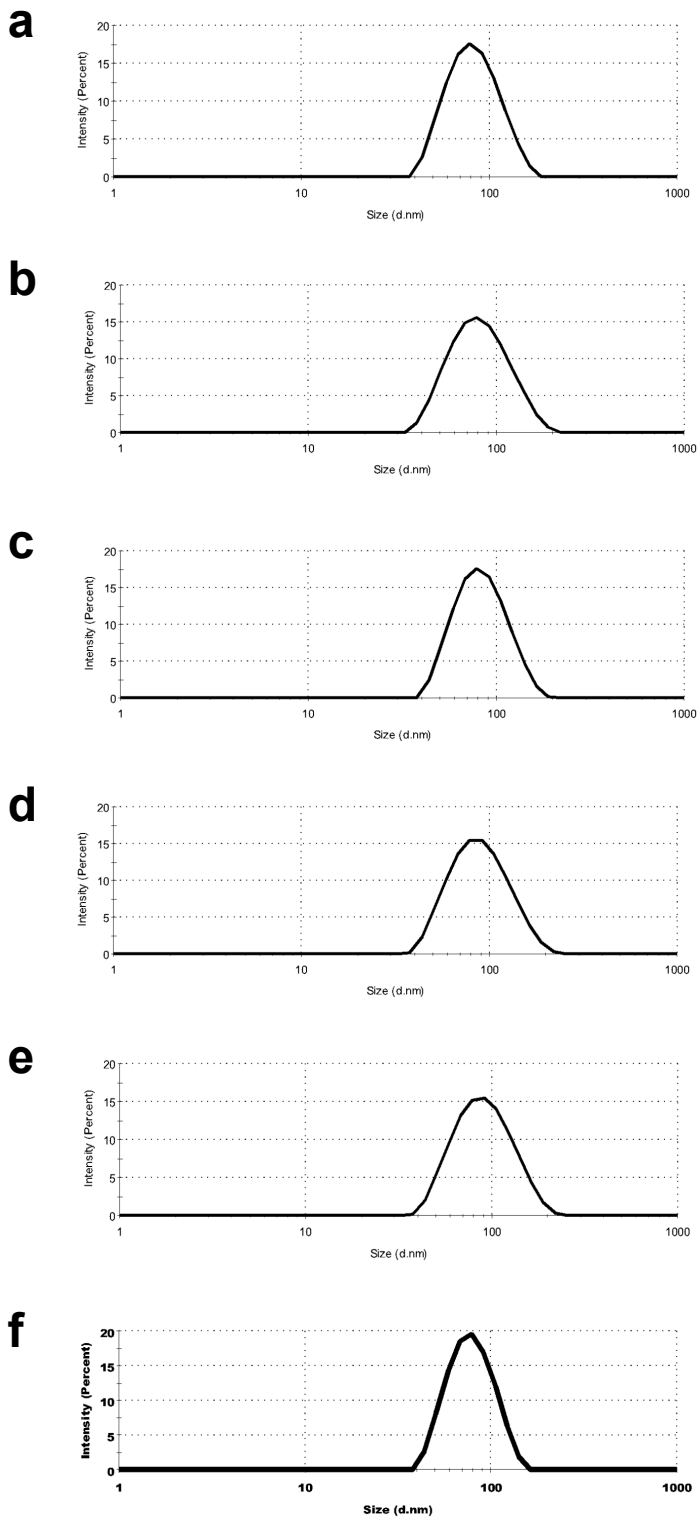

**Figure S8.** Size distribution by intensity for lipid nanoparticles used in this study. (a) LNP with siRNA against Ubr1. (b) LNP with siRNA against Ubr2. (c) LNP with siRNA against Ubr4. (d) LNP with siRNA against Ubr5. (e) LNP with siRNA against all Ubrs. (f) LNP with siRNA against Luciferase (ctrl-siRNA).

Table S1: Selected siRNA used in the study

|         |               | Sense                           | Anti-sense                      |
|---------|---------------|---------------------------------|---------------------------------|
| si-Ctrl | si-LUC        | cuuAcGcuGAGuAcuucGATsT          | UCGAAGuACUcAGCGuAAGTsT          |
| si-Ubr1 | si-1-1        | caAAGuAGuGuucAuAAAAdTsdT        | UUUuAUGAAcACuACUUUGdTsdT        |
|         | si-1-2        | ccuucGGuGAuAAaAuAcAdTsdT        | UGuAUUUuAUcACCGAAGGdTsdT        |
|         | si-1-3        | gguuAuGGcucAccAGAAAdTsdT        | UUUCUGGUGAGCcAuAACCDTsdT        |
|         | si-1-4        | gacuuuAGAcAGAuAuuuudTsdT        | AAAAuAUCUGUCuAAAGUCdTsdT        |
|         | si-1-5        | gacAGGAACAAuAaAuucAdTsdT        | UGAAUUuAUUGUUCUGUCdTsdT         |
|         | <b>si-1-6</b> | <b>caGAcuAGGuGcuauuucAdTsdT</b> | <b>UGAAAuAGcACCuAGUCUGdTsdT</b> |
|         | si-1-7        | gauuAAAcAGuAuaAuAcAdTsdT        | UGuAUuAuACUGUUuAAUCdTsdT        |
|         | si-1-8        | gcuuAGAGAAuGucAuAAAAdTsdT       | UUuAUGAcAUUCUCuAAGCdTsdT        |
|         | si-1-9        | ggcccGGcuGuuAcuGAAAdTsdT        | UUUCAGuAAcAGCCGGGCCdTsdT        |
|         | si-1-10       | caGAAuAucGGGuuAuAAudTsdT        | AUuAuAACCCGAuAUUCUGdTsdT        |
| si-Ubr2 | si-2-1        | gauGGuGAACAGccAAucAdTsdT        | UGAUUGGCUGUUCcAcAUCdTsdT        |
|         | si-2-2        | ccAAGAAAAAGuuaGcAuudTsdT        | AAUGCcAACUUUUUCUUGGdTsdT        |
|         | si-2-3        | auuGuuAAGcAAAaGuGAAdTsdT        | UUcACUUUUGCUuAAcAAUdTsdT        |
|         | si-2-4        | aaGuGAAGuGGcAuAuAAAAdTsdT       | UUuAuAUGCcACUUCACUdTsdT         |
|         | si-2-5        | aguGAAGuGGcAuauAAAudTsdT        | AUUuAuAUGCcACUUCACUdTsdT        |
|         | si-2-6        | aguGGcAuAuAAAuuuccAdTsdT        | UGGAAAUUuAuAUGCcACUdTsdT        |
|         | si-2-7        | gcuccuAccucuAaGuGAAdTsdT        | UUcACUuAGAGGuAGGAGCdTsdT        |
|         | si-2-8        | gauAGAAcAuccucuuAGAdTsdT        | UCuAAGAGGAUGUUCuAUCdTsdT        |
|         | <b>si-2-9</b> | <b>ggcGAGAGuGuucGAcAAAdTsdT</b> | <b>UUGUCGAAcAUCUCUGCCdTsdT</b>  |
|         | si-2-10       | gacuAuGGGAAGAgAuucAdTsdT        | UGAAUCUCUUCcAuAGUCdTsdT         |
| si-Ubr4 | si-4-1        | caAAGAAGuGAcuAcGAAdTsdT         | UUCGuAGUcAUCUUCUUUGdTsdT        |
|         | si-4-2        | gcAAGuGuAGuucAuGAAdTsdT         | UUcACUGAACuAcACUUGCdTsdT        |
|         | si-4-3        | gaAccuAGGGuuuccGAAAdTsdT        | UUUCGGAAACCCuAGGUUCdTsdT        |
|         | si-4-4        | gcAuuuGGcuGuuaGccAudTsdT        | AUGGCuAAcAGCcAAAUGCdTsdT        |
|         | si-4-5        | cgAucAAccuGuAcuAcAAdTsdT        | UUGuAGuAcAGGUUGAUCGdTsdT        |
|         | si-4-6        | cacGGAGcAuuGuauuAcAdTsdT        | UGuAAuAcAAUGCUCUGdTsdT          |
|         | <b>si-4-7</b> | <b>ggAcAuGAccAcAgGuAcAdTsdT</b> | <b>UGuACCUGUGGUcAUGUCCdTsdT</b> |
|         | si-4-8        | gccGGuAucAAGAacAAcAdTsdT        | UGUUGUUCUUGAuACCGCdTsdT         |
|         | si-4-9        | ccAuGGAAuGAGauuGAAdTsdT         | UUcAAUCUcAUUUCcAUGGdTsdT        |
|         | si-4-10       | gcuuGAGuGuGuAcAucudTsdT         | AAGAUGuAcAcACUcAAGCdTsdT        |
| si-Ubr5 | si-5-1        | agcuGAACAGuAcAAuuudTsdT         | AAAUUGuACUUGUUCAGCUdTsdT        |
|         | si-5-2        | ggAGcAGGcuAcuauuAAAAdTsdT       | UUuAAuAGuAGCCUGCUCCdTsdT        |
|         | si-5-3        | ggcAcAAGuuGuucuAcAAdTsdT        | UUGuAGAAcAACUUGUGCCdTsdT        |
|         | <b>si-5-4</b> | <b>ugAuAAGGAuGGAacAAAAdTsdT</b> | <b>UUUUGUUCcAUCCUuAUcAdTsdT</b> |
|         | si-5-5        | guAGcuAcuGAAAauAAcAdTsdT        | UGUuAUUUUcAGuAGCuACdTsdT        |
|         | si-5-6        | ccGAGAAGAcuGAaAuAcudTsdT        | AGuAUUUcAGUCUUCUGGdTsdT         |
|         | si-5-7        | gcGcucAGAAAGAAuAcAdTsdT         | UGuAUUUUCUUCUGAGCGCdTsdT        |
|         | si-5-8        | gaAucAGGGAGGAucGcAAdTsdT        | UUGCGAUCCUCCUGAUUCdTsdT         |
|         | si-5-9        | ggcuucGuccAAAaAGAAAdTsdT        | UUUCUUUUUGGACGAAGCCdTsdT        |
|         | si-5-10       | caGccAAuuGGAAaAuGcAdTsdT        | UGcAUUUUCcAAUUGGCUGdTsdT        |

Uppercase letters: ribonucleotides

Lowercase letters: 2'-O-Methyl nucleotides

s: phosphorothioate

Table S2: Primers used in this study

| Name       | Sequence, 5' → 3'       |
|------------|-------------------------|
| mGAPDH dir | AGGTCGGTGTGAACGGATTTG   |
| mGAPDH rev | TGTAGACCATGTAGTTGAGGTCA |
| mUbr1up    | CCCAGCAGTTCCTGTCTTGT    |
| mUbr1lo    | ATCAGGAGGCACTTTCAGGC    |
| mUbr2up    | AGAGTTTTTCAGTCGCAGACCT  |
| mUbr2lo    | TGATCGGGTCCATTCCCTGC    |
| mUbr4up    | GCAGGGAGGGGTACAAGTTC    |
| mUbr4lo    | GGCCTCTAGCCAACCTGAC     |
| mUbr5up    | AGAACCATTACCACCACGGC    |
| mUbr5lo    | CCACCTCAACCTCTTCCACG    |

Table S3: Effect of long-term knockdown of Ubr-ubiquitin ligases of the N-End rule in mouse liver on parameters of serum chemistry.

|                         | PBS         | LNP-siCtrl  | LNP-siUbrs               | ANOVA P-Levels |
|-------------------------|-------------|-------------|--------------------------|----------------|
| ALP (U/L)               | 102 ± 11    | 88 ± 10     | 212 ± 54 <sup>§,¶</sup>  | 0.0001         |
| AST (U/L)               | 102 ± 34    | 106 ± 35    | 207 ± 59 <sup>§,¶</sup>  | 0.0038         |
| ALT (U/L)               | 19 ± 4      | 23 ± 3      | 62 ± 21 <sup>§,¶</sup>   | 0.0006         |
| BUN (mg/dL)             | 32 ± 5      | 31 ± 2      | 27 ± 4                   | 0.1830         |
| Albumin (g/dL)          | 2.9 ± 0.1   | 2.9 ± 0.1   | 2.6 ± 0.2 <sup>§,¶</sup> | 0.0007         |
| Total bilirubin (mg/dL) | 0.16 ± 0.05 | 0.10 ± 0.00 | 0.20 ± 0.07 <sup>¶</sup> | 0.0302         |
| Total protein (g/dL)    | 4.7 ± 0.1   | 5.0 ± 0.1*  | 4.3 ± 0.3 <sup>§,¶</sup> | 0.0001         |
| Globulin (g/dL)         | 1.7 ± 0.1   | 2.1 ± 0.1*  | 1.7 ± 0.1 <sup>¶</sup>   | <0.0001        |
| Cholesterol (mg/dL)     | 75 ± 4      | 86 ± 10     | 32 ± 3 <sup>§,¶</sup>    | <0.0001        |

ALP: Alkaline Phosphatase ; AST: Aspartate Aminotransferase; ALT: Alanine Aminotransferase ; BUN: Blood Urea Nitrogen

§: Tukey post hoc comparison of PBS vs LNP-siUbrs, P< 0.01, P< 0.001

¶: Tukey post hoc comparison of LNP-siCtrl vs LNP-siUbrs, P< 0.01, P< 0.001

❖: Tukey post hoc comparison of PBS vs LNP-siCtrl, P< 0.01

Table S4: Characteristics of lipid nanoparticles used in our study.

| LNP-siRNA   | Particle size, nm | Polydispersity index, PdI | Zeta potential |
|-------------|-------------------|---------------------------|----------------|
| LNP si-Ubr1 | 84,5 ± 1,1        | 0,093                     | 3,2 ± 1,7      |
| LNP si-Ubr2 | 85,9 ± 0,6        | 0,1                       | 3,7 ± 1,7      |
| LNP si-Ubr4 | 85,4 ± 0,7        | 0,094                     | 3,4 ± 1,4      |
| LNP si-Ubr5 | 92,1 ± 2,0        | 0,1                       | 3,2 ± 1,2      |
| LNP si-Ubrs | 94,8 ± 3,7        | 0,13                      | 2,9 ± 1,5      |
| LNP si-Ctrl | 80.0 ± 0.8        | 0.062                     | 3.9 ± 1.5      |
